# Supplementary material
Source: HighWire-hosted journal article supplement (https://www.ajnr.org/highwire/filestream/52698/field_highwire_adjunct_files/0/15-00244.pdf)
Supplement: 15-00244.pdf [file 15-00244.pdf]

**On-line Table 1: Patient characteristics**

| Patient No. | Age at Surgery (yr) | Sex | Histologic Diagnosis | WHO Grade | Tumor Location            | Type of Surgery | Adjuvant Therapy | DTI | Tumor Progression | Follow-Up Period or PFS (mo) |
|-------------|---------------------|-----|----------------------|-----------|---------------------------|-----------------|------------------|-----|-------------------|------------------------------|
| 1           | 11                  | M   | DA                   | II        | L frontal                 | TR              | –                | +   | –                 | 14                           |
| 2           | 15                  | F   | DA                   | II        | R thalamus                | PR              | –                | –   | –                 | 11                           |
| 3           | 25                  | M   | DA                   | II        | L temporal                | PR              | –                | +   | +                 | 7                            |
| 4           | 25                  | F   | DA                   | II        | L insula                  | PR              | –                | +   | –                 | 58                           |
| 5           | 25                  | M   | DA                   | II        | L temporal                | PR              | –                | +   | +                 | 12                           |
| 6           | 26                  | M   | DA                   | II        | R frontal                 | PR              | –                | +   | –                 | 50                           |
| 7           | 28                  | M   | DA                   | II        | L temporal                | PR              | –                | +   | +                 | 19                           |
| 8           | 30                  | F   | DA                   | II        | L temporal                | PR              | RT               | +   | –                 | 28                           |
| 9           | 31                  | M   | DA                   | II        | R insula                  | TR              | –                | +   | –                 | 21                           |
| 10          | 39                  | M   | DA                   | II        | R insula                  | PR              | –                | –   | –                 | 38                           |
| 11          | 41                  | M   | DA                   | II        | L temporal                | TR              | –                | +   | +                 | 64                           |
| 12          | 41                  | F   | DA                   | II        | L frontal                 | TR              | –                | +   | –                 | 10                           |
| 13          | 42                  | F   | DA                   | II        | L frontal                 | TR              | –                | +   | –                 | 24                           |
| 14          | 43                  | F   | DA                   | II        | L insula                  | TR              | –                | +   | –                 | 24                           |
| 15          | 43                  | M   | DA                   | II        | R temporal                | PR              | –                | +   | +                 | 37                           |
| 16          | 50                  | F   | DA                   | II        | L thalamus                | B               | –                | +   | –                 | 58                           |
| 17          | 59                  | F   | DA                   | II        | L frontal                 | PR              | –                | +   | +                 | 7                            |
| 18          | 65                  | F   | DA                   | II        | R insula                  | PR              | RT + TMZ         | +   | –                 | 21                           |
| 19          | 67                  | M   | DA                   | II        | L insula-temporal         | PR              | –                | +   | –                 | 12                           |
| 20          | 33                  | M   | OA                   | II        | L frontal                 | PR              | –                | +   | +                 | 34                           |
| 21          | 36                  | M   | OA                   | II        | R frontal                 | TR              | –                | +   | –                 | 12                           |
| 22          | 35                  | M   | O                    | II        | R basal ganglia           | PR              | RT + TMZ         | +   | +                 | 21                           |
| 23          | 40                  | M   | O                    | II        | R frontal                 | TR              | –                | +   | –                 | 4                            |
| 24          | 19                  | F   | AA                   | III       | L thalamus                | B               | RT + TMZ         | +   | –                 | 61                           |
| 25          | 28                  | F   | AA                   | III       | L frontal                 | TR              | RT + TMZ         | +   | +                 | 5                            |
| 26          | 29                  | M   | AA                   | III       | R thalamus                | PR              | RT + TMZ         | +   | +                 | 7                            |
| 27          | 31                  | F   | AA                   | III       | Bilateral frontal         | PR              | RT + TMZ         | +   | +                 | 19                           |
| 28          | 48                  | M   | AA                   | III       | L insula-thalamus         | PR              | RT + TMZ         | +   | –                 | 48                           |
| 29          | 58                  | F   | AA                   | III       | L temporal                | PR              | RT + TMZ         | –   | –                 | 2                            |
| 30          | 62                  | F   | AA                   | III       | L temporal                | PR              | RT + TMZ         | +   | –                 | 11                           |
| 31          | 67                  | F   | AA                   | III       | L thalamus                | B               | RT + TMZ         | +   | +                 | 1                            |
| 32          | 76                  | M   | AA                   | III       | L parietal                | PR              | TMZ              | +   | +                 | 36                           |
| 33          | 29                  | F   | AOA                  | III       | L insula                  | TR              | RT + TMZ         | –   | –                 | 11                           |
| 34          | 39                  | F   | AOA                  | III       | R frontal insula-temporal | PR              | RT + PAV         | +   | –                 | 15                           |
| 35          | 59                  | M   | AOA                  | III       | R frontal                 | TR              | RT + TMZ         | +   | –                 | 36                           |

**Note:**—WHO indicates World Health Organization; DA, diffuse astrocytoma; OA, oligoastrocytoma; O, oligodendroglioma; AA, anaplastic astrocytoma; AOA, anaplastic oligoastrocytoma; L, left; R, right; TR, total resection (>95%); PR, partial resection; B, biopsy; RT, radiotherapy; TMZ, temozolomide; PAV, procarbazine + adjuvant chemotherapy with nimustine + vincristine.

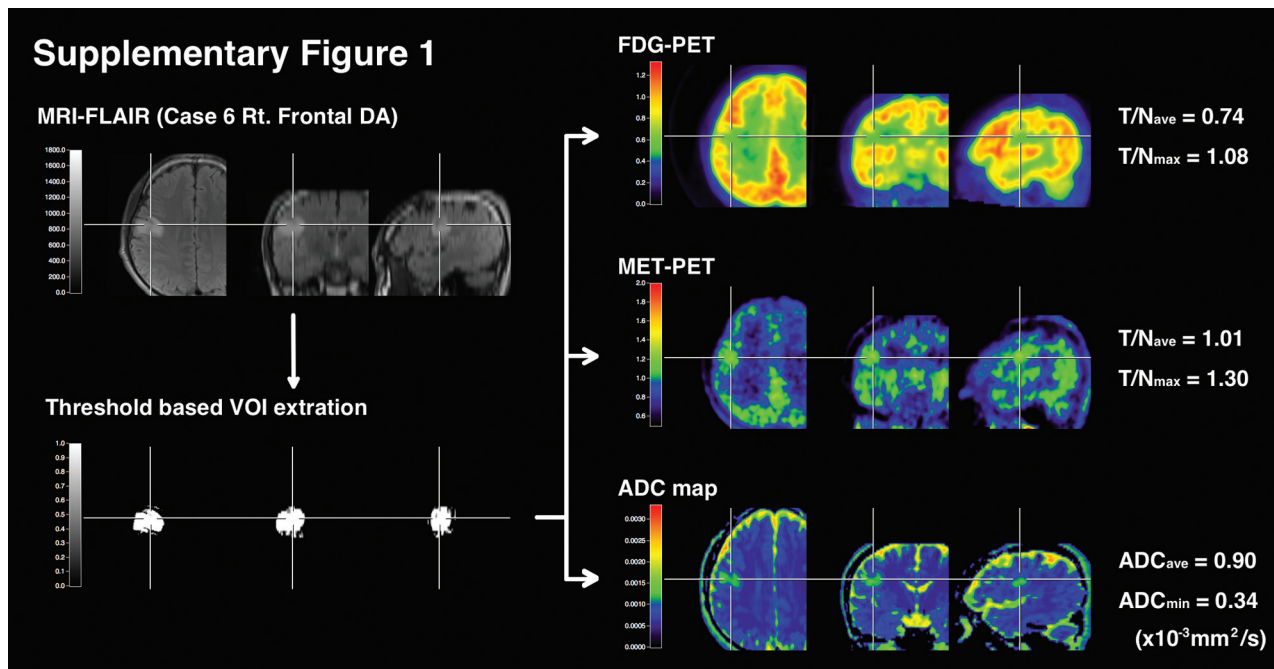

**ON-LINE FIG 1.** Case presentation of the image-analysis process. A 26-year-old man with a right frontal lobe diffuse astrocytoma (World Health Organization grade II). All the images were coregistered by using VINCI image-analysis software, and high-intensity lesions on T2/FLAIR imaging were semiautomatically segmented in 3D by image-intensity threshold. The segmented voxels of interest were applied to registered PET images and ADC maps, followed by calculation of the average and maximum or minimal values of each parameter within the VOI.

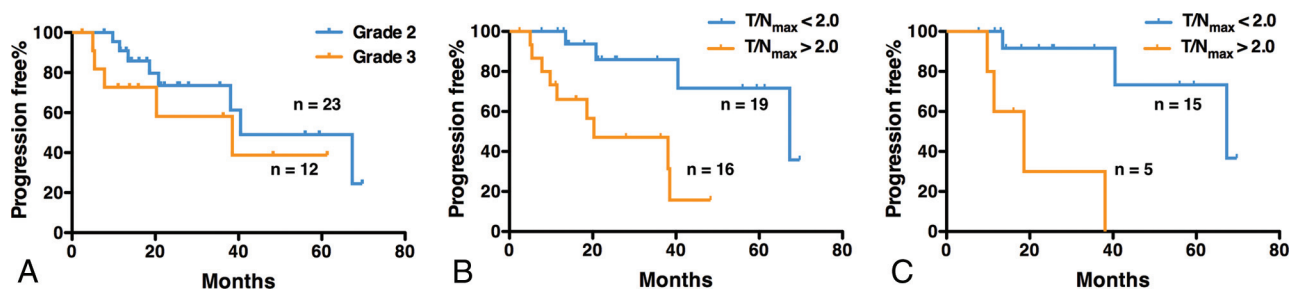

**ON-LINE FIG 2.** Progression-free survival analysis by tumor grade and MET PET results. Progression-free survival from the date when PET images were obtained to the date of tumor progression is shown in Kaplan-Meier curves according to tumor grade (A). Patients with  $T/N_{max}$  of  $< 2.0$  showed prolonged progression-free survival compared with those with  $T/N_{max}$  of  $> 2.0$  (B,  $P = .004$ ). This was also true when the analysis was restricted to patients who received no adjuvant therapy (C,  $P = .004$ ).

**On-line Table 2: Survival analysis based on PET tracer uptakes**

| Patient Grouping                  | Imaging Parameters |                    | Cutoff Value | Progression-Free Survival (Median and 95% CI in mo) |                    | P Value in Log-Rank |
|-----------------------------------|--------------------|--------------------|--------------|-----------------------------------------------------|--------------------|---------------------|
|                                   |                    |                    |              | Lower Than Cutoff                                   | Higher Than Cutoff |                     |
| All patients                      | FDG                | T/N <sub>ave</sub> | 0.611        | 20.6 (7.4–N/D)                                      | 64.2 (34.0–64.2)   | .47                 |
|                                   |                    | T/N <sub>max</sub> | 1.54         | 37.0 (18.8–N/D)                                     | 64.2 (N/D–N/D)     | .28                 |
|                                   | MET                | T/N <sub>ave</sub> | 1.1          | 64.2 (20.6–64.2)                                    | 36.3 (18.6–N/D)    | .12                 |
|                                   |                    | T/N <sub>max</sub> | 2.01         | 64.2 (34–64.2)                                      | 18.8 (7.4–37.0)    | .006 <sup>a</sup>   |
| Patients without adjuvant therapy | FDG                | T/N <sub>ave</sub> | 0.611        | 18.6 (7.4–N/D)                                      | 64.2 (34.0–64.2)   | .26                 |
|                                   |                    | T/N <sub>max</sub> | 1.54         | 37.0 (18.6–N/D)                                     | 64.2 (N/D–N/D)     | .32                 |
|                                   | MET                | T/N <sub>ave</sub> | 1.1          | 64.2 (12.1–64.2)                                    | 37.0 (7.4–37)      | .06                 |
|                                   |                    | T/N <sub>max</sub> | 2.01         | 64.2 (34–64.2)                                      | 18.6 (7.4–37.0)    | .004 <sup>a</sup>   |
| Patients with adjuvant therapy    | FDG                | T/N <sub>ave</sub> | 0.611        | N/D (20.6–N/D)                                      | 36.3 (4.5–N/D)     | .99                 |
|                                   |                    | T/N <sub>max</sub> | 1.54         | 36.3 (7.2–N/D)                                      | N/D                | N/D                 |
|                                   | MET                | T/N <sub>ave</sub> | 1.1          | N/D (20.6–N/D)                                      | 36.3 (4.5–N/D)     | .99                 |
|                                   |                    | T/N <sub>max</sub> | 2.01         | N/D (20.6–N/D)                                      | 36.3 (7.2–N/D)     | .37                 |
| Patients with grade II glioma     | FDG                | T/N <sub>ave</sub> | 0.611        | 20.6 (7.4–N/D)                                      | 64.2 (34.0–64.2)   | .15                 |
|                                   |                    | T/N <sub>max</sub> | 1.54         | 37.0 (18.6–N/D)                                     | 64.2 (N/D–N/D)     | .30                 |
|                                   | MET                | T/N <sub>ave</sub> | 1.1          | 64.2 (20.6–64.2)                                    | 37.0 (7.4–37.0)    | .14                 |
|                                   |                    | T/N <sub>max</sub> | 2.01         | 64.2 (20.6–64.2)                                    | 18.6 (7.4–37.0)    | .016 <sup>a</sup>   |
| Patients with grade III glioma    | FDG                | T/N <sub>ave</sub> | 0.611        | N/D                                                 | 36.3 (4.5–N/D)     | N/D                 |
|                                   |                    | T/N <sub>max</sub> | 1.54         | 36.3 (4.5–N/D)                                      | N/D                | N/D                 |
|                                   | MET                | T/N <sub>ave</sub> | 1.1          | N/D                                                 | 36.3 (4.5–N/D)     | N/D                 |
|                                   |                    | T/N <sub>max</sub> | 2.01         | N/D                                                 | 36.3 (1.4–N/D)     | .22                 |

**Note:**—N/D indicates not detected.

<sup>a</sup>P < .05.
